# Supplementary material for: Clinicopathological characteristics and survival outcomes for testicular choriocarcinoma: a population-based study
Source: PubMed Central journal article supplement — Transl Androl Urol. 2021 Jan;10(1):408–16. doi: 10.21037/tau-20-1061 (PMC7844494; doi:10.21037/tau-20-1061), 2021-01
Supplement: tau-10-01-408-supplementary.pdf [file tau-10-01-408-supplementary.pdf]

**Table S1** Clinicopathological characteristics of patients with testicular choriocarcinoma (CC) or seminoma after PSM

|                          | Choriocarcinoma, n=546(%) | Seminoma, n=1089(%) | P value |
|--------------------------|---------------------------|---------------------|---------|
| Age (years)              |                           |                     | 0.921   |
| ≤30 years                | 325 (59.5)                | 651 (59.8)          |         |
| >30 years                | 221 (40.5)                | 438 (40.2)          |         |
| Marital status           |                           |                     | 0.882   |
| Married                  | 183 (33.5)                | 361 (33.1)          |         |
| Not married <sup>a</sup> | 363 (66.5)                | 728 (66.9)          |         |
| Laterality               |                           |                     | 0.995   |
| Left or right            | 538 (98.5)                | 1073 (98.5)         |         |
| Bilateral                | 8 (1.5)                   | 16 (1.5)            |         |
| Tumor size (cm)          |                           |                     | 0.843   |
| ≤4                       | 248 (45.4)                | 489 (44.9)          |         |
| >4                       | 298 (54.6)                | 600 (55.1)          |         |
| SEER stage               |                           |                     | 0.952   |
| Localized                | 299 (54.8)                | 599 (55.0)          |         |
| Regional                 | 98 (18.0)                 | 200 (18.4)          |         |
| Distant                  | 149 (27.3)                | 290 (26.6)          |         |
| Surgery                  |                           |                     | 0.708   |
| No                       | 20 (3.7)                  | 36 (3.3)            |         |
| Yes                      | 526 (96.3)                | 1053 (96.7)         |         |
| Chemotherapy             |                           |                     | 0.950   |
| No/unknown               | 226 (41.4)                | 449 (41.2)          |         |
| Yes                      | 320 (58.6)                | 640 (58.8)          |         |

<sup>a</sup>, not married included divorced, separated, single (never married), unmarried or domestic partner and widowed.

**Table S2** Univariate Cox proportional hazards regression model analysis of overall survival and cancer-special survival for testicular choriocarcinoma (CC) patients

| Characteristics          | Cancer-special survival |         | Overall survival      |         |
|--------------------------|-------------------------|---------|-----------------------|---------|
|                          | HR (95% CI)             | P value | HR (95% CI)           | P value |
| <b>Age</b>               |                         |         |                       |         |
| ≤30 years                | Reference               | –       | Reference             | –       |
| >30 years                | 1.772 (1.194–2.629)     | 0.004   | 1.768 (1.224–2.554)   | 0.002   |
| <b>Marital status</b>    |                         |         |                       |         |
| Married                  | Reference               | –       | Reference             | –       |
| Not married <sup>a</sup> | 1.251 (0.799–1.957)     | 0.328   | 1.23 (0.810–1.868)    | 0.331   |
| <b>Laterality</b>        |                         |         |                       |         |
| Left or right            | Reference               | –       | Reference             | –       |
| Bilateral                | 5.928 (3.418–10.28)     | <0.001  | 5.041 (2.925–8.687)   | <0.001  |
| <b>Tumor size</b>        |                         |         |                       |         |
| ≤4                       | Reference               | –       | Reference             | –       |
| >4                       | 0.844 (0.534–1.336)     | 0.469   | 0.871 (0.571–1.329)   | 0.522   |
| <b>SEER stage</b>        |                         |         |                       |         |
| Localized                | Reference               | –       | Reference             | –       |
| Regional                 | 3.117 (1.005–9.667)     | 0.05    | 2.198 (0.837–5.775)   | 0.11    |
| Distant                  | 19.799 (8.652–45.310)   | <0.001  | 13.354 (6.959–25.625) | <0.001  |
| <b>Surgery</b>           |                         |         |                       |         |
| No                       | Reference               | –       | Reference             | –       |
| Yes                      | 0.127 (0.081–0.197)     | <0.001  | 0.147 (0.096–0.224)   | <0.001  |
| <b>Chemotherapy</b>      |                         |         |                       |         |
| None/unknown             | Reference               | –       | Reference             | –       |
| Yes                      | 5.521 (2.87–10.62)      | <0.001  | 4.85 (2.721–8.647)    | <0.001  |
| <b>Pathological type</b> |                         |         |                       |         |
| Pure choriocarcinoma     | Reference               | –       | Reference             | –       |
| Mixed type               | 0.223 (0.15–0.331)      | <0.001  | 0.228 (0.157–0.329)   | <0.001  |

<sup>a</sup>, not married included divorced, separated, single (never married), unmarried or domestic partner and widowed.
